# Supplementary material for: Diagnostic procedures & practices in drug allergy/hypersensitivity: a survey of 13 Asian countries
Source: PubMed Central journal article supplement — Asia Pac Allergy. 2020 Oct 15;10(4):e36. doi: 10.5415/apallergy.2020.10.e36 (PMC7610088; doi:10.5415/apallergy.2020.10.e36), 2020-10-15
Supplement: apa-10-e36-s001.pdf [file apa-10-e36-s001.pdf]

## 2. ANTIBIOTIC ALLERGY

- 2.1 EAACI 2019: Towards a more precise diagnosis of hypersensitivity to beta-lactams - an EAACI position paper
- 2.2 WAO 2013: Hypersensitivity reactions to non beta-lactam antimicrobial agents, a statement of the WAO special committee on drug allergy
- 2.3 EAACI 2009: Update on evaluation of hypersensitivity reactions to betalactams
- 2.4 EAACI 2003: Diagnosis of immediate allergic reactions to beta-lactam antibiotics

## 3. NSAID HYPERSENSITIVITY

- 3.1 SEAIC 2019: Position Statement of the Spanish Society of Allergology and Clinical Immunology on Provocation Tests with Aspirin/Nonsteroidal anti-inflammatory drugs
- 3.2 EAACI 2013: Hypersensitivity to nonsteroidal anti-inflammatory drugs (NSAIDs) – classification, diagnosis and management: review of the EAACI/ENDA(#) and GA2LEN/HANNA\*

## 4. INTRA-OPERATIVE ANAPHYLAXIS/ ANAESTHETIC AGENTS

- 4.1 EAACI 2019: Position paper on the investigation of perioperative immediate hypersensitivity reactions
- 4.2 Spanish Society of Allergology and Clinical Immunology (2018): Practical guidelines for perioperative hypersensitivity reactions
- 4.3 SFAR 2011: Reducing the risk of anaphylaxis during anesthesia: 2011 updated guidelines for clinical practice
- 4.4 BSACI 2009: BSACI guidelines for the investigation of suspected anaphylaxis during general anaesthesia

## 5. RADIOCONTRAST MEDIA

- 5.1 Spanish Society of Allergology and Clinical Immunology 2015: Clinical practice guidelines on the diagnosis and management of hypersensitivity reactions to contrast media
- 5.2 EAACI 2005: Management of hypersensitivity reactions to iodinated contrast media

## 6. VACCINE ADVERSE REACTIONS

- 6.1 Practice parameter 2017: Administration of influenza vaccines to egg allergic recipients
- 6.2 AAAAI 2012: Adverse reactions to vaccines 2012 parameter update

## 7. SKIN TESTS

- 7.1 ASCIA 2016: Skin prick testing for the diagnosis of allergic diseases (practitioner’s manual)
- 7.2 EAACI 2015: In-vivo Diagnosis of Allergic Diseases – Allergen Provocation Tests
- 7.3 EAACI 2013: Skin test concentrations for systemically administered drugs — an ENDA/EAACI Drug Allergy Interest Group position paper
- 7.4 Patch testing in non-immediate drug eruptions by Romano A (2008)
- 7.5 AAAAI 2008: Allergy diagnostic testing: an updated practice parameter

## 8. IN-VITRO TESTS

- 8.1 EAACI 2016: In-vitro tests for drug hypersensitivity reactions
- 8.2 EAACI 2015: The Clinical Utility of Basophil Activation Testing in Diagnosis and Monitoring of Allergic Disease

## 9. DRUG PROVOCATION TESTS

- 9.1 WAO 2016: Risk and safety requirements for diagnostic and therapeutic procedures in allergology
- 9.2 EAACI/GA<sup>2</sup>LEN guideline 2007: Aspirin provocation tests for diagnosis of aspirin hypersensitivity
- 9.3 EAACI 2003: Drug provocation testing in the diagnosis of drug hypersensitivity reactions: general considerations

**10. DESENSITIZATION**

- 10.1 EAACI 2013: Desensitization in delayed drug hypersensitivity reactions — an EAACI position paper of the Drug Allergy Interest Group
- 10.2 EAACI 2010: General considerations on rapid desensitization for drug hypersensitivity – a consensus statement

**11. PHARMACOGENOMIC TESTING**

Clinical Pharmacogenomics Implementation Consortium (CPIC) Guidelines & Publications

**12. STEVENS-JOHNSON SYNDROME/TOXIC EPIDERMAL NECROLYSIS**

- 12.1 British Association of Dermatologists Guidelines 2016

**13. MASTOCYTOSIS AND MAST CELL ACTIVATION SYNDROMES**

- 13.1 EAACI 2015: Drug hypersensitivity in clonal mast cell disorders
- 13.2 Mastocytosis and allergic diseases (2015)

**14. PAEDIATRIC DRUG ALLERGY**

- 14.1 EAACI 2019: Diagnosis and management of drug induced anaphylaxis in children: an EAACI position paper
- 14.2 EAACI 2018: Diagnosis and management of hypersensitivity reactions to NSAIDs in children and adolescents
- 14.3 NICE 2014 : Diagnosis and management of drug allergy in adults, children and young people
- 14.4 Royal College of Paediatrics and Child Health (RCPCH) 2012: Allergy Care pathway for Children – Drug Allergy

|   |                                                                                               |                                                                                                                                                                                                                                                                                                                                                         |                                                                                                                                                                                                  |
|---|-----------------------------------------------------------------------------------------------|---------------------------------------------------------------------------------------------------------------------------------------------------------------------------------------------------------------------------------------------------------------------------------------------------------------------------------------------------------|--------------------------------------------------------------------------------------------------------------------------------------------------------------------------------------------------|
| 5 | Are there adult drug allergy centres/clinics in your country?                                 | Yes: please specify the number:<br>No                                                                                                                                                                                                                                                                                                                   | <input type="checkbox"/><br><input type="checkbox"/>                                                                                                                                             |
| 6 | Are there paediatric drug allergy centres/clinics in your country?                            | Yes: please specify the number:<br>No                                                                                                                                                                                                                                                                                                                   | <input type="checkbox"/><br><input type="checkbox"/>                                                                                                                                             |
| 7 | Which of the following tests for drug allergy/hypersensitivity are available in your country? | Skin prick and intradermal test → go to section (A)<br>Specific IgE in-vitro tests → go to section (B)<br>Other tests for immediate reactions → go to section (C)<br>Lymphocyte transformation test → go to section (D)<br>Patch testing → go to section (E)<br>Pharmacogenomic tests → go to section (F)<br>Drug provocation tests → go to section (G) | <input type="checkbox"/><br><input type="checkbox"/><br><input type="checkbox"/><br><input type="checkbox"/><br><input type="checkbox"/><br><input type="checkbox"/><br><input type="checkbox"/> |

**(A) SKIN TESTING**

|    |                                                                                         |                                               |                                                                                  |
|----|-----------------------------------------------------------------------------------------|-----------------------------------------------|----------------------------------------------------------------------------------|
| 8  | Do you have access to penicillin skin test reagents?                                    | Yes<br>No                                     | <input type="checkbox"/><br><input type="checkbox"/>                             |
| 9  | From where do you obtain your skin test reagent for benzylpenicilloyl polylysine (PPL)? | In-house<br>Diater ®<br><br>Others – specify: | <input type="checkbox"/><br><input type="checkbox"/><br><input type="checkbox"/> |
| 10 | From where do you obtain your skin test reagent for minor determinant mix (MDM)?        | In-house<br>Diater ®<br>Others – specify:     | <input type="checkbox"/><br><input type="checkbox"/><br><input type="checkbox"/> |
| 11 | Which drugs are commonly skin tested in your country?                                   | Penicillins<br>Cephalosporins                 | <input type="checkbox"/><br><input type="checkbox"/>                             |

|    |                                          |                                             |                          |
|----|------------------------------------------|---------------------------------------------|--------------------------|
|    |                                          | Carbapenems                                 | <input type="checkbox"/> |
|    |                                          | Non-beta lactam antibiotics                 | <input type="checkbox"/> |
|    |                                          | General anaesthetic agents                  | <input type="checkbox"/> |
|    |                                          | Local anaesthetic agents                    | <input type="checkbox"/> |
|    |                                          | Radiocontrast media (RCM)                   | <input type="checkbox"/> |
|    |                                          | NSAIDs                                      | <input type="checkbox"/> |
|    |                                          | Others – specify: Corticosteroids, Insulins | <input type="checkbox"/> |
| 12 | Who prepares the drugs for skin testing? | Allergist                                   | <input type="checkbox"/> |
|    |                                          | Dermatologist                               | <input type="checkbox"/> |
|    |                                          | Pharmacist                                  | <input type="checkbox"/> |
|    |                                          | Nurse clinician/specialist                  | <input type="checkbox"/> |
|    |                                          | Others – specify:                           | <input type="checkbox"/> |

**(B) SPECIFIC IgE IN-VITRO TESTS**

|    |                                                               |                                  |                          |
|----|---------------------------------------------------------------|----------------------------------|--------------------------|
| 13 | Are in-house or commercial assays available for these tests?  | Commercial                       | <input type="checkbox"/> |
|    |                                                               | In-house                         | <input type="checkbox"/> |
|    |                                                               | Both                             | <input type="checkbox"/> |
|    |                                                               | Neither                          | <input type="checkbox"/> |
| 14 | Which commercial tests are available in your country?         | CAP-FEIA (Phadia ImmunoCAP®)     | <input type="checkbox"/> |
|    |                                                               | RAST (Radioallergosorbent test®) | <input type="checkbox"/> |
|    |                                                               | Euroimmune Allercoat 6 ELISA     | <input type="checkbox"/> |
|    |                                                               | FLOW-CAST (Buhlmann Labs®)       | <input type="checkbox"/> |
|    |                                                               | FLOW-2-CAST (Buhlmann Labs®)     | <input type="checkbox"/> |
|    |                                                               | CAST-ELISA (Buhlmann Labs®)      | <input type="checkbox"/> |
|    |                                                               | Others – specify:                | <input type="checkbox"/> |
| 15 | Which drugs are commonly tested using these in-vitro methods? | Alfa-gal                         | <input type="checkbox"/> |
|    |                                                               | Ampicilloyl                      | <input type="checkbox"/> |
|    |                                                               | Amoxicilloyl                     | <input type="checkbox"/> |
|    |                                                               | Cefaclor                         | <input type="checkbox"/> |
|    |                                                               | Cephalosporins                   | <input type="checkbox"/> |
|    |                                                               | Chlorhexidine                    | <input type="checkbox"/> |
|    |                                                               | Chymopapain                      | <input type="checkbox"/> |
|    |                                                               | Gelatin                          | <input type="checkbox"/> |
|    |                                                               | General anaesthetic agents       | <input type="checkbox"/> |
|    |                                                               | Insulin porcine, human, bovine   | <input type="checkbox"/> |
|    |                                                               | Morphine                         | <input type="checkbox"/> |
|    |                                                               | NSAIDs                           | <input type="checkbox"/> |
|    |                                                               | Penicilloyl G                    | <input type="checkbox"/> |
|    |                                                               | Penicilloyl V                    | <input type="checkbox"/> |
|    |                                                               | Pholcodine                       | <input type="checkbox"/> |
|    |                                                               | Protamine                        | <input type="checkbox"/> |
|    |                                                               | Suxamethonium                    | <input type="checkbox"/> |
|    |                                                               | Tetanus toxoid                   | <input type="checkbox"/> |
|    |                                                               | Others – specify:                | <input type="checkbox"/> |

**(C) OTHER TESTS FOR IMMEDIATE REACTIONS**

|    |                                                                  |     |                          |
|----|------------------------------------------------------------------|-----|--------------------------|
| 16 | Is serum total tryptase available in your country?               | Yes | <input type="checkbox"/> |
|    |                                                                  | No  | <input type="checkbox"/> |
| 17 | Is the basophil activation test (BAT) available in your country? | Yes | <input type="checkbox"/> |
|    |                                                                  | No  | <input type="checkbox"/> |

**(D) LYMPHOCYTE TRANSFORMATION TESTS (LTT)**

|                   |                                                                          |                                                     |                          |
|-------------------|--------------------------------------------------------------------------|-----------------------------------------------------|--------------------------|
| 18                | Is LTT used in the clinical or research setting?                         | Clinical                                            | <input type="checkbox"/> |
|                   |                                                                          | Research                                            | <input type="checkbox"/> |
|                   |                                                                          | Both clinical and research                          | <input type="checkbox"/> |
| 19                | Where are these tests done?                                              | In-house                                            | <input type="checkbox"/> |
|                   |                                                                          | Sent to another facility in the same region/country | <input type="checkbox"/> |
|                   |                                                                          | Sent to another facility out of the region/country  | <input type="checkbox"/> |
| 20                | What drugs are commonly tested using LTT in your country?                | Antibiotics (beta-lactams)                          | <input type="checkbox"/> |
|                   |                                                                          | Antibiotics (non-beta lactams)                      | <input type="checkbox"/> |
|                   |                                                                          | Anti-epileptics                                     | <input type="checkbox"/> |
|                   |                                                                          | ACE inhibitors                                      | <input type="checkbox"/> |
|                   |                                                                          | Anti-tuberculous drugs                              | <input type="checkbox"/> |
|                   |                                                                          | Diuretics                                           | <input type="checkbox"/> |
|                   |                                                                          | NSAIDs & selective COX-2 inhibitors                 | <input type="checkbox"/> |
|                   |                                                                          | Pyrazolones                                         | <input type="checkbox"/> |
|                   |                                                                          | Local anaesthetic agents                            | <input type="checkbox"/> |
|                   |                                                                          | HMG-CoA reductase inhibitors                        | <input type="checkbox"/> |
|                   |                                                                          | Opioids                                             | <input type="checkbox"/> |
|                   |                                                                          | Neuromuscular blockers                              | <input type="checkbox"/> |
|                   |                                                                          | Contact allergens                                   | <input type="checkbox"/> |
| Others - specify: | <input type="checkbox"/>                                                 |                                                     |                          |
| 21                | For what types of delayed reactions are LTT commonly used for diagnosis? | Acute generalized exanthematous pustolosis (AGEP)   | <input type="checkbox"/> |
|                   |                                                                          | Blood dyscracias (cytopenias)                       | <input type="checkbox"/> |
|                   |                                                                          | Drug induced hypersensitivity syndrome (DiHS)       | <input type="checkbox"/> |
|                   |                                                                          | Fixed drug eruption (FDE)                           | <input type="checkbox"/> |
|                   |                                                                          | Hepatitis                                           | <input type="checkbox"/> |
|                   |                                                                          | Immunobullous eruptions                             | <input type="checkbox"/> |
|                   |                                                                          | Interstitial nephritis                              | <input type="checkbox"/> |
|                   |                                                                          | Maculopapular exanthems (MPE)                       | <input type="checkbox"/> |
|                   |                                                                          | Stevens Johnson syndrome                            | <input type="checkbox"/> |
|                   |                                                                          | Toxic epidermal necrolysis                          | <input type="checkbox"/> |
|                   |                                                                          | Vasculitis                                          | <input type="checkbox"/> |
|                   |                                                                          | Others – specify:                                   | <input type="checkbox"/> |

**(E) PATCH TESTS**

|    |                                                   |                                 |                          |
|----|---------------------------------------------------|---------------------------------|--------------------------|
| 22 | Is this used in the clinical or research setting? | Clinical                        | <input type="checkbox"/> |
|    |                                                   | Research                        | <input type="checkbox"/> |
|    |                                                   | Both clinical and research      | <input type="checkbox"/> |
| 23 | What formulation of the drug is used for testing? | Pure substance                  | <input type="checkbox"/> |
|    |                                                   | Commercialized form of the drug | <input type="checkbox"/> |
|    |                                                   | Others – specify:               | <input type="checkbox"/> |

|                   |                                                                                       |                                                                         |                          |
|-------------------|---------------------------------------------------------------------------------------|-------------------------------------------------------------------------|--------------------------|
| 24                | What dilutions of the drug are used                                                   | 0.1%                                                                    | <input type="checkbox"/> |
|                   |                                                                                       | 1%                                                                      | <input type="checkbox"/> |
|                   |                                                                                       | 5%                                                                      | <input type="checkbox"/> |
|                   |                                                                                       | 10% and 30%                                                             | <input type="checkbox"/> |
| 25                | What vehicle is used?                                                                 | Petrolatum                                                              | <input type="checkbox"/> |
|                   |                                                                                       | Water                                                                   | <input type="checkbox"/> |
|                   |                                                                                       | Alcohol                                                                 | <input type="checkbox"/> |
| 26                | How do you obtain the drugs for patch testing?                                        | In-house                                                                | <input type="checkbox"/> |
|                   |                                                                                       | Chemotechnique®                                                         | <input type="checkbox"/> |
|                   |                                                                                       | Commercial - specify:                                                   | <input type="checkbox"/> |
|                   |                                                                                       | Others - specify:                                                       | <input type="checkbox"/> |
| 27                | Which of the following are also tested?                                               | Preservative                                                            | <input type="checkbox"/> |
|                   |                                                                                       | Colouring                                                               | <input type="checkbox"/> |
|                   |                                                                                       | Excipient                                                               | <input type="checkbox"/> |
|                   |                                                                                       | None of the above                                                       | <input type="checkbox"/> |
| 28                | When is the patch test reading done?                                                  | 20 minutes                                                              | <input type="checkbox"/> |
|                   |                                                                                       | 48 h (Day 2)                                                            | <input type="checkbox"/> |
|                   |                                                                                       | 96 h (Day 4)                                                            | <input type="checkbox"/> |
|                   |                                                                                       | Day 7 if Day 2,4 negative                                               | <input type="checkbox"/> |
| 29                | Is photo patch testing done for photoallergens?                                       | Yes                                                                     | <input type="checkbox"/> |
|                   |                                                                                       | No                                                                      | <input type="checkbox"/> |
| 30                | What drugs have you used for patch testing?                                           | Antibiotics (beta-lactams)                                              | <input type="checkbox"/> |
|                   |                                                                                       | Antibiotics (non-beta lactams)                                          | <input type="checkbox"/> |
|                   |                                                                                       | Anti-epileptics                                                         | <input type="checkbox"/> |
|                   |                                                                                       | Anti-tuberculous drugs                                                  | <input type="checkbox"/> |
|                   |                                                                                       | Aciclovir, valaciclovir                                                 | <input type="checkbox"/> |
|                   |                                                                                       | Corticosteroids                                                         | <input type="checkbox"/> |
|                   |                                                                                       | NSAIDs & selective COX-2 inhibitors                                     | <input type="checkbox"/> |
|                   |                                                                                       | Cotrimoxazole                                                           | <input type="checkbox"/> |
|                   |                                                                                       | Diltiazem                                                               | <input type="checkbox"/> |
|                   |                                                                                       | Hydroxyzine                                                             | <input type="checkbox"/> |
|                   |                                                                                       | Heparin derivatives                                                     | <input type="checkbox"/> |
|                   |                                                                                       | Pseudoephedrine                                                         | <input type="checkbox"/> |
|                   |                                                                                       | Radiocontrast media                                                     | <input type="checkbox"/> |
|                   |                                                                                       | Statins                                                                 | <input type="checkbox"/> |
| Tetrazepam        | <input type="checkbox"/>                                                              |                                                                         |                          |
| Others - specify: | <input type="checkbox"/>                                                              |                                                                         |                          |
| 31                | For what types of delayed reactions have you used patch testing to help in diagnosis? | Acute generalized exanthematous pustolosis (AGEP)                       | <input type="checkbox"/> |
|                   |                                                                                       | Drug induced hypersensitivity syndrome (DiHS)                           | <input type="checkbox"/> |
|                   |                                                                                       | Drug induced lupus erythematosus (DILS)                                 | <input type="checkbox"/> |
|                   |                                                                                       | Fixed drug eruption (FDE)                                               | <input type="checkbox"/> |
|                   |                                                                                       | Immunobullous eruptions                                                 | <input type="checkbox"/> |
|                   |                                                                                       | Maculopapular exanthems (MPE)                                           | <input type="checkbox"/> |
|                   |                                                                                       | Stevens Johnson syndrome                                                | <input type="checkbox"/> |
|                   |                                                                                       | Symmetrical drug-related intertriginous and flexural exanthema (SDRIFE) | <input type="checkbox"/> |
|                   |                                                                                       | Toxic epidermal necrolysis                                              | <input type="checkbox"/> |
|                   |                                                                                       | Vasculitis                                                              | <input type="checkbox"/> |
|                   |                                                                                       | Others – specify:                                                       | <input type="checkbox"/> |

**(F) PHARMACOGENOMIC TESTS**

|    |                                                                        |                                                                                                      |                                                                                                              |
|----|------------------------------------------------------------------------|------------------------------------------------------------------------------------------------------|--------------------------------------------------------------------------------------------------------------|
| 32 | Which tests are <b>mandatory</b> in your country before prescribing?   | HLA-B*5701 (Abacavir)<br>HLA-B*5801 (Allopurinol)<br>HLA-B*1502 (Carbamazepine)<br>Others – specify: | <input type="checkbox"/><br><input type="checkbox"/><br><input type="checkbox"/>                             |
| 33 | Which tests are <b>recommended</b> in your country before prescribing? | HLA-B*5701 (Abacavir)<br>HLA-B*5801 (Allopurinol)<br>HLA-B*1502 (Carbamazepine)<br>Others – specify: | <input type="checkbox"/><br><input type="checkbox"/><br><input type="checkbox"/><br><input type="checkbox"/> |

**(G) DRUG PROVOCATION TESTS**

|    |                                                                                                                                                                                                                                                                                                                                                                                                                                                       |                                                                                                                                          |                                                                                                                                                                      |
|----|-------------------------------------------------------------------------------------------------------------------------------------------------------------------------------------------------------------------------------------------------------------------------------------------------------------------------------------------------------------------------------------------------------------------------------------------------------|------------------------------------------------------------------------------------------------------------------------------------------|----------------------------------------------------------------------------------------------------------------------------------------------------------------------|
| 34 | What are the main indications for drug provocation tests in your centre/country?                                                                                                                                                                                                                                                                                                                                                                      |                                                                                                                                          |                                                                                                                                                                      |
|    | Exclude hypersensitivity (non-suggestive history/non-specific symptoms)<br>Provide safe pharmacologically/structurally non-related drugs in proven hypersensitivity (e.g. beta-lactams)<br>Exclude cross-reactivity of related drugs in proven hypersensitivity (e.g. cephalosporin in a penicillin allergic)<br>Definitive diagnosis in suggestive history with negative, non-conclusive or non- available allergological tests<br>Others - specify: | <input type="checkbox"/><br><input type="checkbox"/><br><input type="checkbox"/><br><input type="checkbox"/><br><input type="checkbox"/> |                                                                                                                                                                      |
| 35 | Who prepares the drug used for provocation testing?                                                                                                                                                                                                                                                                                                                                                                                                   | Pharmacist<br>Nurse clinician<br>Doctor (IV/SC)<br>Others – specify:                                                                     | <input type="checkbox"/><br><input type="checkbox"/><br><input type="checkbox"/><br><input type="checkbox"/>                                                         |
| 36 | What are the types of provocation tests used?                                                                                                                                                                                                                                                                                                                                                                                                         | Open challenge<br>Single blind placebo control<br>Double blind placebo control<br>Others – specify:                                      | <input type="checkbox"/><br><input type="checkbox"/><br><input type="checkbox"/><br><input type="checkbox"/>                                                         |
| 37 | What are the common routes of administration used?                                                                                                                                                                                                                                                                                                                                                                                                    | Oral (tablet)<br>Oral (capsule)<br>Oral (syrup)<br>Intramuscular<br>Subcutaneous<br>Intravenous<br>Others – specify:                     | <input type="checkbox"/><br><input type="checkbox"/><br><input type="checkbox"/><br><input type="checkbox"/><br><input type="checkbox"/><br><input type="checkbox"/> |
| 38 | What are the common routes of administration for aspirin provocation tests ?                                                                                                                                                                                                                                                                                                                                                                          | Oral aspirin challenge<br>Bronchial (inhalation) l-lysine-aspirin (l-ASA) challenge<br>Nasal l-ASA challenge                             | <input type="checkbox"/><br><input type="checkbox"/><br><input type="checkbox"/>                                                                                     |

**DESENSITIZATION**

|    |                                                                 |                                                                                                                                                                                                                                                       |                                                                                                                                                                      |
|----|-----------------------------------------------------------------|-------------------------------------------------------------------------------------------------------------------------------------------------------------------------------------------------------------------------------------------------------|----------------------------------------------------------------------------------------------------------------------------------------------------------------------|
| 39 | What are the common drugs for which desensitizations are done ? | Betalactam antibiotics<br>Non-betalactam antibiotics –specify:<br>Chemotherapeutic agents<br>Monoclonal antibodies<br>High-dose aspirin (chronic rhinosinusitis+/-nasal polyposis)<br>Low-dose aspirin (coronary artery disease)<br>Others – specify: | <input type="checkbox"/><br><input type="checkbox"/><br><input type="checkbox"/><br><input type="checkbox"/><br><input type="checkbox"/><br><input type="checkbox"/> |
| 40 | Which are the common modes of desensitization ?                 | Rapid<br>Slow<br>Both rapid and slow                                                                                                                                                                                                                  | <input type="checkbox"/><br><input type="checkbox"/><br><input type="checkbox"/>                                                                                     |
| 41 | Where are these commonly done ?                                 | Inpatient general wards<br>Inpatient high dependency/ intensive care units<br>Outpatient day ward<br>Outpatient clinic<br>Others: specify:                                                                                                            | <input type="checkbox"/><br><input type="checkbox"/><br><input type="checkbox"/><br><input type="checkbox"/><br><input type="checkbox"/>                             |

*Thank you for completing this survey.*

*Drug Allergy Committee, APAAACI*
